# Supplementary material for: The Association of ATG16L1 Variations with Clinical Phenotypes of Adult-Onset Still’s Disease
Source: MDPI journal article supplement (doi:10.3390/genes12060904), 2021-06-11
Supplement: s1 [file s1]

**Table S1. The examined single nucleotide polymorphisms (SNPs) of 12 candidate genes potentially involved in autophagy signaling pathway**

| Gene     | SNP ID     | TaqMan no.         | Chromosome: position | Location       | MAF           | HWE (p-value) |
|----------|------------|--------------------|----------------------|----------------|---------------|---------------|
| Beclin-1 | rs10512488 | C_27102741_10      | 17:42811886          | intron variant | A (G>A), 0.01 | 0.751         |
| ATG5     | rs573775   | C_910347_20        | 6:106316991          | intron variant | A (G>A), 0.33 | 0.586         |
|          | rs510432   | C_910351_10        | 6: 106326155         | intron variant | T (C>T), 0.29 | 0.239         |
|          | rs633724   | C_1328947_20       | 6: 106286165         | intron variant | T (C>T), 0.30 | 0.249         |
|          | rs9373839  | C_3001898_10       | 6: 106207742         | intron variant | C (T>C), 0.02 | 0.787         |
| ATG7     | rs1375206  | C_1288835_10       | 3: 11297643          | intron variant | C (G>C), 0.34 | 0.000         |
| MAP1LC3B | rs2873702  | No available probe | 16:87403154          | intron variant | A (G>A), 0.00 | 0.000         |
| SQSTM1   | rs565280   | C_645001_20        | 5:179826926          | intron variant | A (G>A), 0.02 | 0.917         |

|         |            |               |              |                     |               |       |
|---------|------------|---------------|--------------|---------------------|---------------|-------|
|         | rs4935     | C_11416203_10 | 5: 179833153 | synonymous<br>codon | C (T>C), 0.33 | 0.000 |
|         | rs2241880  | C_9095577_20  | 2:233274722  | transcript variant  | G (A>G), 0.34 | 0.064 |
| ATG16L1 | rs10210302 | C_30179764_10 | 2:233250193  | transcript variant  | T (C>T), 0.34 | 0.141 |
|         | rs1045100  | C_8741775_20  | 2:233294951  | transcript variant  | C (T>C), 0.33 | 0.201 |

**Table S2. Demographics and clinical manifestations of AOSD patients and health controls**

|                         | AOSD (n=129) HC (n=129) |             |
|-------------------------|-------------------------|-------------|
| Age, year (Mean± SD)    | 37.5 ± 14.6             | 34.7 ± 10.4 |
| Female (n,%)            | 94 (72.9%)              | 99 (76.7%)  |
| Fever (n,%)             | 125 (96.9%)             | NA          |
| Rash (n,%)              | 108 (83.7%)             | NA          |
| Sore throat (n,%)       | 101 (78.3%)             | NA          |
| Arthrtis (n,%)          | 76 (58.9%)              | NA          |
| Lymphadenopathy (n,%)   | 55 (42.6%)              | NA          |
| Liver dysdunction (n,%) | 47 (36.4%)              | NA          |
